# Supplementary material for: Empirical evaluation of the TXRF detector field of view – a coffee-ring case study
Source: Royal Society of Chemistry journal article supplement (doi:10.1039/d3ja00316g), 2023-11-10
Supplement: d3ja00316g1.pdf [file d3ja00316g1.pdf]

Electronic Supplementary Information: Empirical evaluation of the TXRF detector field of view – a coffee-ring case study

Sven Hampel<sup>1</sup>, Franziska Sand<sup>1</sup>, Heiko Sebastian Till<sup>1</sup> and Ursula Elisabeth Adriane Fittschen<sup>1\*</sup>

<sup>1</sup> Clausthal University of Technology, Institute of Inorganic and Analytical Chemistry, Arnold-Sommerfeld-Straße 4, 38678 Clausthal-Zellerfeld, Germany

\* corresponding author:

Ursula Elisabeth Adriane Fittschen

Clausthal University of Technology, Institute of Inorganic and Analytical Chemistry, Arnold-Sommerfeld-Straße 4, 38678 Clausthal-Zellerfeld, Germany

phone: +49 (0) 5323 72 2205

email: [ursula.fittschen@tu-clausthal.de](mailto:ursula.fittschen@tu-clausthal.de)

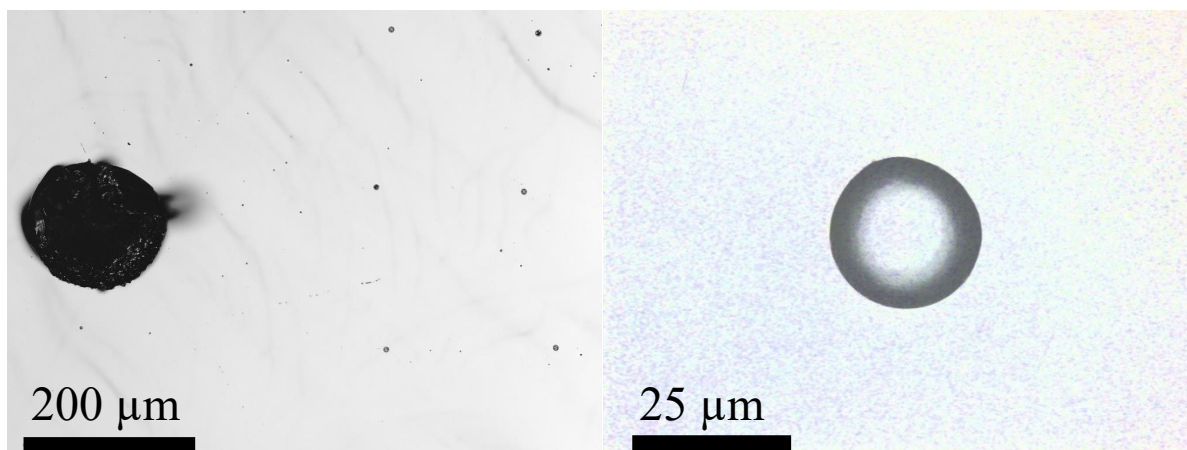

**Figure S1: Laser intensity images from confocal laser scanning microscopy of typical picoliter derived specimens. A large residue (150 μm diameter, 60 μm height) is shown along small residues (25 μm diameter, 9 μm height)**

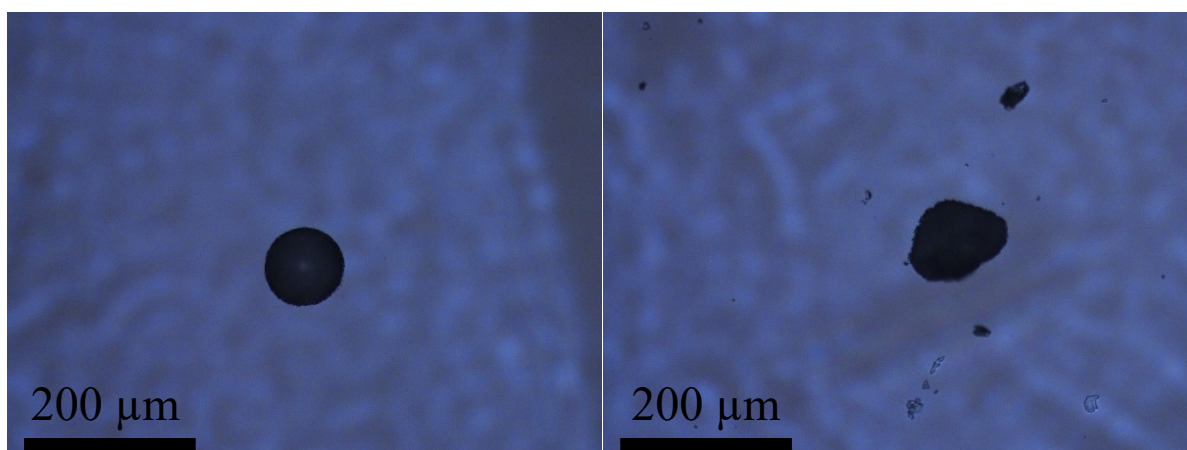

**Figure S2: Optical microscopy images of residues from the second series of picoliter derived specimens for the FOV determination with a) round shape and b) distorted shape.**

In general, colour maps show the net intensities of Co  $K\alpha$ -line, the standard deviation of the net intensities, and the sensitivities at each point relative to the Ga  $K\alpha$ -line. Each black dot represents the position of an individual sample.

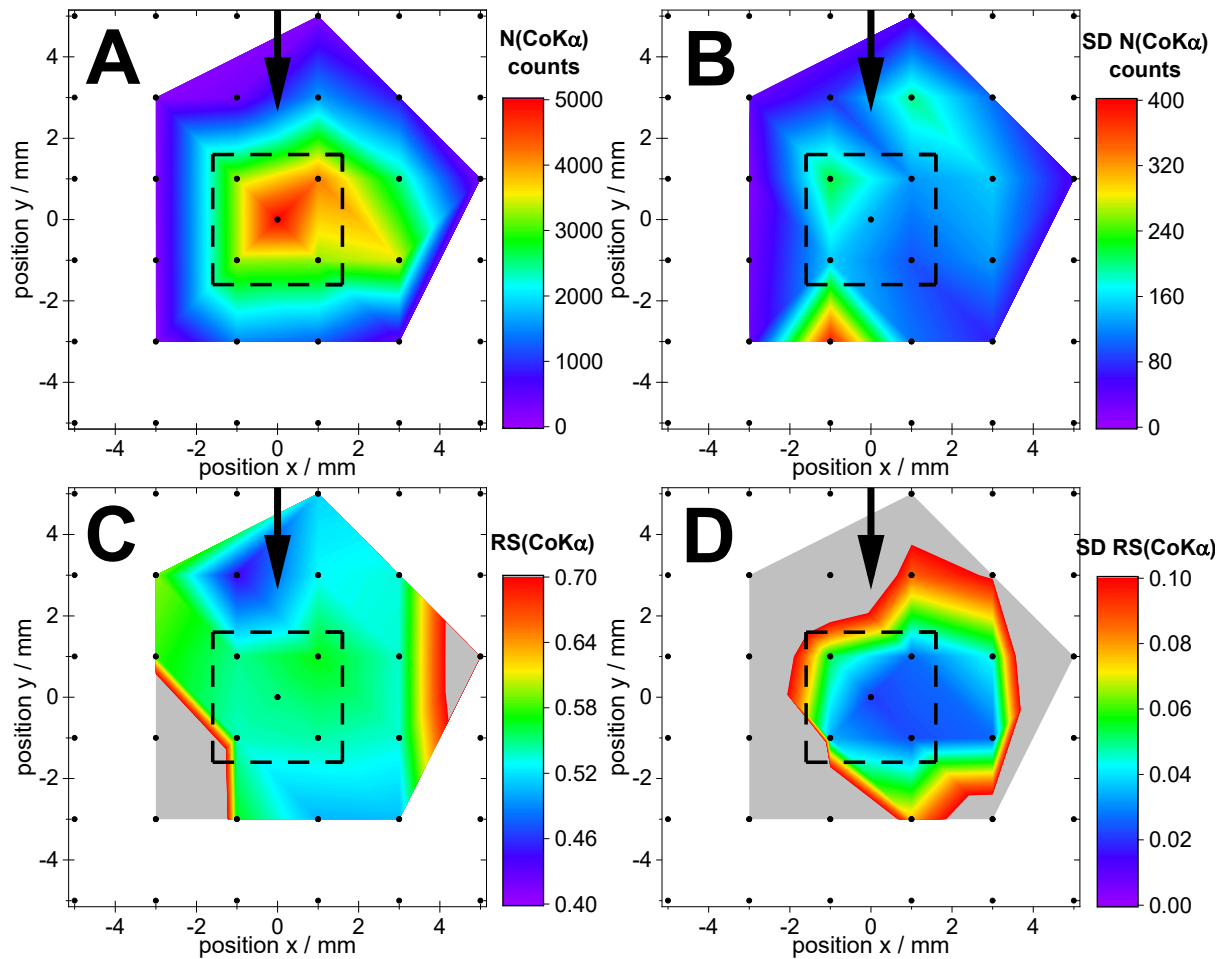

**Figure S3: Intensity and sensitivity distribution of Co  $K\alpha$ -lines for the first series. Net intensity (panel A), SD of the net intensity ( $n = 6$ , panel B), the local RS (panel C), and the SD of the local RS ( $n = 6$ , panel D). Each black dot represents the position of an individual sample. The arrows indicate the direction of the incident X-rays. Grey colour exceeds the scale, while white colour shows no valid data points.**

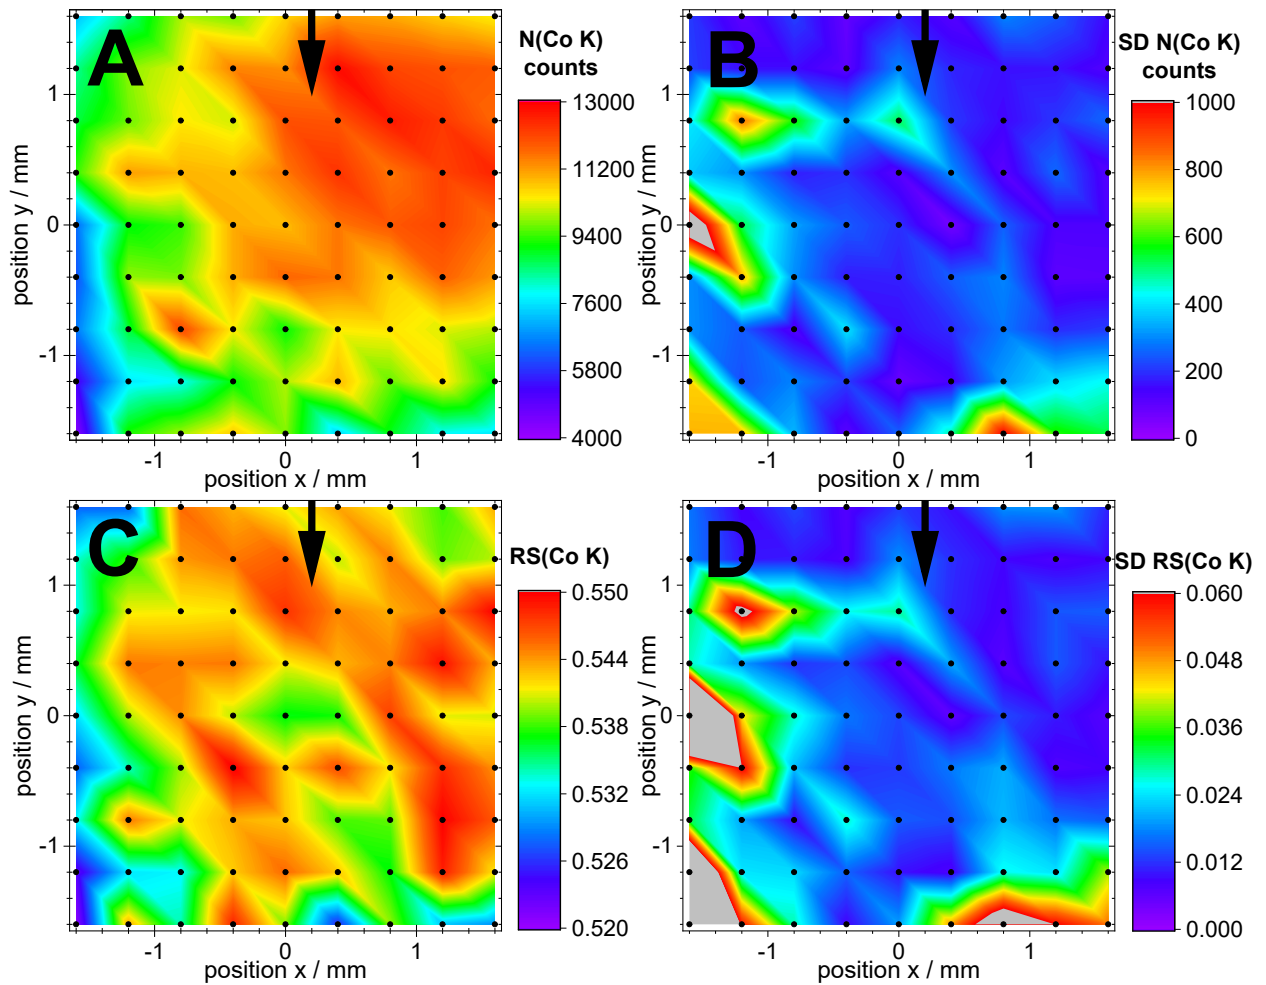

**Figure S4: Intensity and sensitivity distribution of Co K $\alpha$ -lines for the second series. Net intensity (panel A), SD of the net intensity ( $n = 6$ , panel B), the local RS (panel C), and the SD of the local RS ( $n = 6$ , panel D). Each black dot represents the position of an individual sample. The arrows indicate the direction of the incident X-rays. Grey colour exceeds the scale, while violet falls below the scale.**

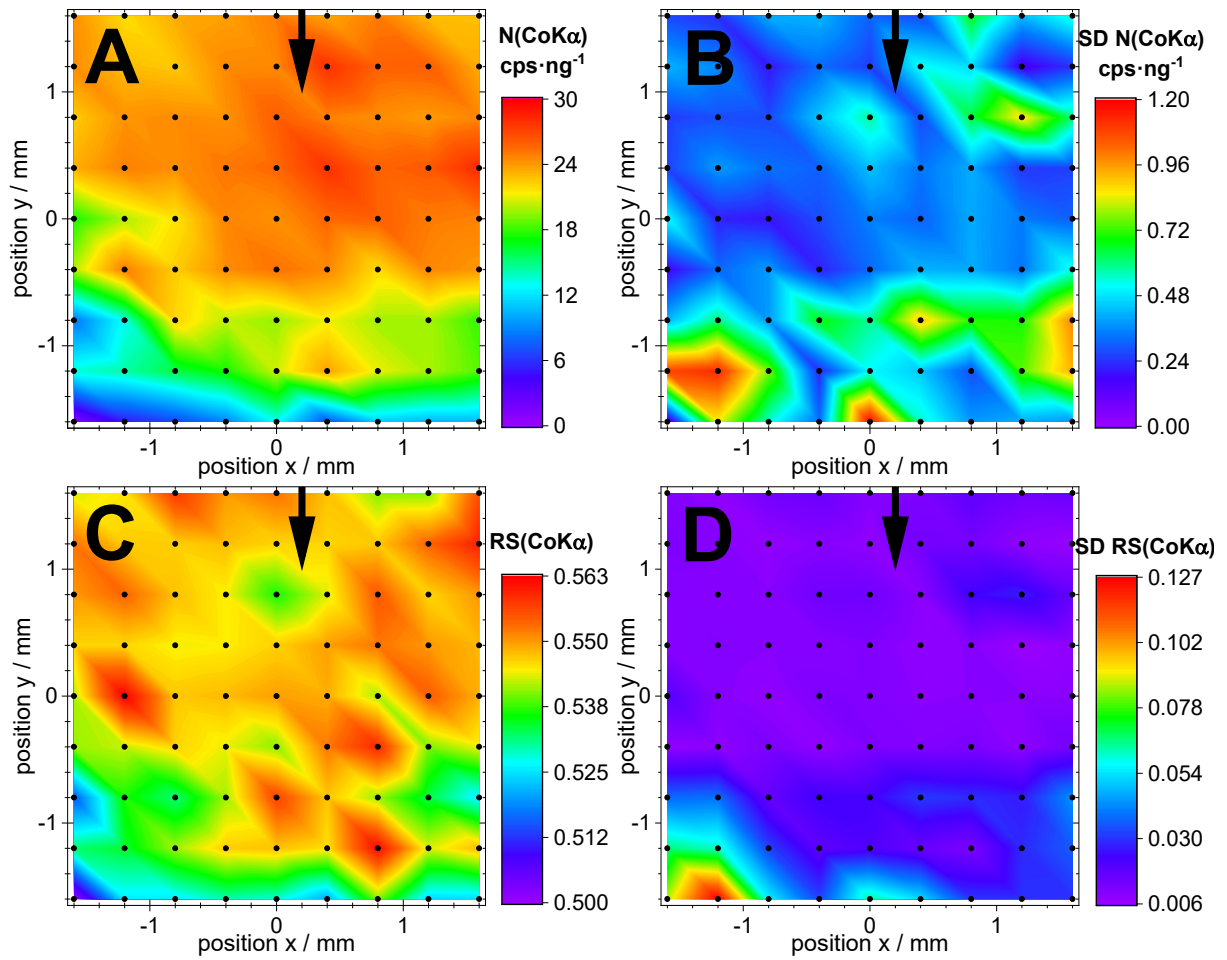

**Figure S5: Merged intensity and sensitivity distribution of Co  $K\alpha$ -lines after alignment of detector unit and autosampler. Normalized intensity (panel A), SD of the normalized intensity ( $n = 6$ , panel B), the local RS (panel C), and the SD of the local RS ( $n = 6$ , panel D). Each black dot represents the position of an individual sample. The black arrow shows the direction of the incident X-rays.**

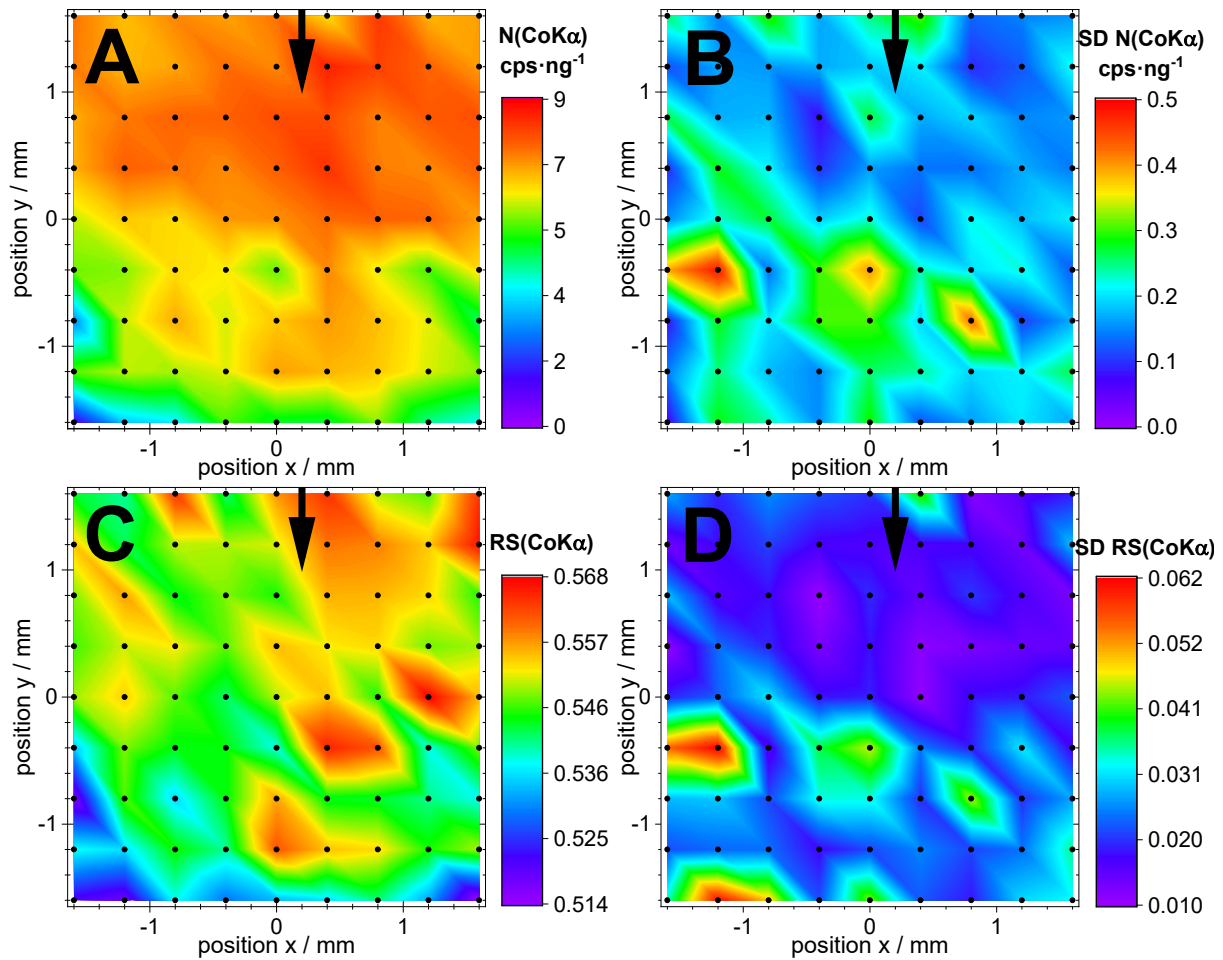

**Figure S6: Merged intensity and sensitivity distribution of Co  $K\alpha$ -lines with Goebel mirror optics after alignment of detector unit and autosampler. Normalized intensity (panel A), SD of the normalized intensity ( $n = 6$ , panel B), the local RS (panel C), and the SD of the local RS ( $n = 6$ , panel D). Each black dot represents the position of an individual sample. The black arrow shows the direction of the incident X-rays.**
